# Supplementary material
Source: publisher site journal article supplement (https://www.spandidos-publications.com/1219/downloadSupplementary)
Supplement: Supplementary file 1 [file downloadSupplementary]

Table SI. Patient characteristics.

| Patient   | Age | Sex    | Location    | Feature of specimen       |
|-----------|-----|--------|-------------|---------------------------|
| Patient 1 | 23  | Male   | Left tibia  | Pre-chemotherapy          |
| Patient 2 | 14  | Male   | Right ilium | Pre-chemotherapy          |
| Patient 3 | 28  | Male   | Left femur  | Sensitive to chemotherapy |
| Patient 4 | 17  | Female | Left femur  | Pre-chemotherapy          |
| Patient 5 | 28  | Female | Sacrum      | Pre-chemotherapy          |
| Patient 6 | 12  | Male   | Right femur | Pre-chemotherapy          |
